# Supplementary material
Source: publisher site journal article supplement (https://www.dovepress.com/get_supplementary_file.php?f=393358.docx)
Supplement: Supplementary file 1 [file get_supplementary_file.php]

Supplement Table 1. Perioperative use of glucocorticoids

| Variables | All patients (n=933) | Full cohort (n=933) | | Matched cohort (n=492) | |
| --- | --- | --- | --- | --- | --- |
| diastolic  hypotension (n=676) | no diastolic hypotension (n=257) | diastolic  hypotension (n=246) | no diastolic  hypotension (n=246) |
| Intraoperative dexamethasone | 607 (65.1%) | 424 (62.7%) | 183 (71.2%) | 171 (69.5%) | 175 (71.1%) |
| 5 mg | 134 | 96 | 38 | 35 | 36 |
| 10 mg | 473 | 328 | 145 | 136 | 139 |
| Intraoperative methylprednisolone | 109 (11.7%) | 81 (12.0%) | 28 (10.9%) | 29 (11.8%) | 27 (11.0%) |
| 40mg | 11 | 10 | 1 | 2 | 1 |
| 60 mg | 39 | 28 | 11 | 12 | 11 |
| 80 mg | 59 | 43 | 16 | 15 | 15 |
| Postoperative dexamethasone | 458 (49.1%) | 326 (48.2%) | 132 (51.4%) | 124 (50.4%) | 122 (49.6%) |
| 5 mg | 70 | 58 | 12 | 14 | 12 |
| 10 mg | 388 | 268 | 120 | 110 | 110 |

Results are presented as number (%).

Supplement Table 2. Perioperative use of opioids

| Variable | All patients (n=933) | Full cohort (n=933) | | Matched cohort (n=492) | |
| --- | --- | --- | --- | --- | --- |
| diastolic  hypotension (n=676) | no diastolic hypotension (n=257) | diastolic  hypotension (n=246) | no diastolic  hypotension (n=246) |
| Intraoperative opioids |  |  |  |  |  |
| Fentanyl | NA | NA | NA | NA | NA |
| Fentanyl dosage (ug)a | NA | NA | NA | NA | NA |
| Sufentanil | 722 (77.4%) | 533 (78.8%) | 189 (73.5%) | 194 (78.9%) | 180 (73.2%) |
| Sufentanil dose (ug) a | 35 (20-75) | 30 (15-75) | 40 (20-75) | 30 (20-75) | 30 (20-75) |
| Oxycodone | 568 (60.9%) | 409 (60.5%) | 159 (61.9%) | 134 (54.5%) | 156 (63.4%) |
| Oxycodone dose (mg)a | 20 (10-40) | 20 (10-40) | 20 (10-40) | 20 (10-40) | 20 (10-40) |
| Dezocine | 678 (72.7%) | 483 (71.4%) | 195 (75.9%) | 170 (69.1%) | 187 (76.0%) |
| Dezocine dose (mg) a | 30 (30-30) | 30 (30-30) | 30 (30-30) | 30 (30-30) | 30 (30-30) |
| Postoperative opioids |  |  |  |  |  |
| None b | 0 (0.0%) | 0 (0%) | 0 (0%) | 0 (0%) | 0 (0%) |
| Morphine | 1 (0.1%) | 1 (0.1%) | 0 (0.0%) | 0 (0%) | 0 (0%) |
| Morphine dose (mg) a |  |  |  |  |  |
| Fentanyl | NA | NA | NA | NA | NA |
| Fentanyl dosage (ug) a | NA | NA | NA | NA | NA |
| Sufentanil | 527 (56.5%) | 376 (55.6%) | 151 (58.8%) | 152 (61.8%) | 140 (56.9%) |
| Sufentanil dose (ug) a | 150 (150-150) | 150 (150-150) | 150 (150-150) | 150 (150-150) | 150 (150-150) |
| Oxycodone | 458 (49.1%) | 334 (49.4%) | 124 (48.2%) | 119 (48.4%) | 120 (48.8%) |
| Oxycodone dose (mg)a | 40 (20-40) | 40 (20-40) | 40 (20-40) | 40 (20-40) | 40 (20-40) |
| Dezocine | 746 (80.0%) | 544 (80.5%) | 202 (78.6%) | 194 (78.9%) | 200 (81.3%) |
| Dezocine dose (mg) a | 70 (70-70) | 70 (70-70) | 70 (70-70) | 70 (70-70) | 70 (70-70) |

Results are presented as number (%) or median (interquartile range). P values in bold indicate those of <0.05.

a Dose of patients who received the medication.

b These patients received epidural analgesia through epidural catheter and only local anesthetics were used.

Supplement Table 3. Perioperative use of NSAIDs

| Variable | All patients (n=933) | Full cohort (n=933) | | Matched cohort (n=492) | |
| --- | --- | --- | --- | --- | --- |
| diastolic  hypotension (n=676) | no diastolic hypotension (n=257) | diastolic  hypotension (n=246) | no diastolic hypotension (n=246) |
| Intraoperative flurbiprofen axetil | 59 (6.3%) | 45 (6.7%) | 14 (5.4%) | 18 (7.3%) | 14 (5.7%) |
| 50 mg | 20 | 16 | 4 | 7 | 4 |
| 100 mg | 38 | 29 | 9 | 11 | 9 |
| 200 mg | 1 | 0 | 1 | 0 | 1 |
| Postoperative flurbiprofen axetil | 25 (2.7%) | 20 (3.0%) | 5 (1.9%) | 5 (2.0%) | 5 (2.0%) |
| 100 mg | 2 | 2 | 0 | 0 | 0 |
| 200 mg | 4 | 3 | 1 | 1 | 1 |
| 300 mg | 15 | 12 | 3 | 3 | 3 |
| 400 mg | 4 | 3 | 1 | 1 | 1 |
| Intraoperative parecoxib | 52 (5.6%) | 43 (6.4%) | 9 (3.5%) | 14 (5.7%) | 9 (3.7%) |
| 20 mg | 1 | 1 | 0 | 1 | 0 |
| 40 mg | 12 | 11 | 1 | 3 | 1 |
| 60 mg | 3 | 2 | 1 | 1 | 1 |
| 80 mg | 36 | 29 | 7 | 9 | 7 |

Results are presented as number (%).

NSAIDs, non-steroid anti-inflammatory drugs.
